# Supplementary material
Source: Research Square preprint supplement (doi:10.21203/rs.3.rs-10141417/v1)
Supplement: Supplementary file 1 [file 39a9e5b170c3bd3501e774bf.xlsx]

## Sheet: README
Newton's Laws/Zero Conditional CLIL Study: Organized Data Workbook
Purpose
This workbook organizes the raw dataset for a quasi-experimental CLIL study investigating whether Newton's Laws content supports acquisition and transfer of the zero conditional structure.
Source file	Pasted text(429).txt
Parsed records	353
Variables in uploaded data	Student ID, Year, Group, Pre-Test, Post-Test, Transfer-Task, Physics-Score, Reflection
Groups	EG = Experimental Group; CG = Control Group
Important coding note	Physics-Score and Reflection were administered only to EG. In Raw_Data, CG rows retain uploaded zeroes; in Clean_Analysis they are converted to blanks for analysis columns.
Recommended main comparison	Compare EG and CG post-test grammar gains and Transfer-Task outcomes; use Physics-Score and Reflection for EG-only explanation/triangulation.
Workbook sheets
Raw_Data	Uploaded records preserved in original variable structure.
Clean_Analysis	Analysis-ready copy with gain variables and EG-only physics/reflection analysis fields.
Summary	Computed descriptive summaries and a chart-ready comparison table.
Codebook	Variable definitions, scales, timing, and coding notes.
Instruments_Map	Instrument purpose, use, outputs, and administration plan.
Scoring_Rubrics	Suggested scoring criteria for ZCGT, CGTT, CUT, reflection, and observation.
Observation_Template	Blank observation-coding sheet for classroom use.
Reflection_Items	Likert and open-ended reflection questionnaire items.

## Sheet: Raw_Data
Student ID	Year	Group	Pre-Test	Post-Test	Transfer-Task	Physics-Score	Reflection
001	Fresh	EG	40	85	90	88	4.8
002	Fresh	EG	35	75	80	82	4.2
003	Fresh	EG	38	78	85	84	4.5
004	Fresh	EG	42	82	88	86	4.6
005	Fresh	EG	45	88	92	90	4.9
006	Fresh	EG	33	70	78	75	4
007	Fresh	EG	41	84	89	87	4.7
008	Fresh	EG	39	80	84	83	4.4
009	Fresh	EG	44	87	91	89	4.8
010	Fresh	EG	36	76	81	80	4.2
011	Fresh	EG	43	85	90	88	4.7
012	Fresh	EG	37	77	82	81	4.3
013	Fresh	EG	40	81	87	85	4.5
014	Fresh	EG	46	90	95	92	5
015	Fresh	EG	34	72	79	77	4.1
016	Fresh	EG	42	83	88	86	4.6
017	Fresh	EG	38	79	83	82	4.4
018	Fresh	EG	45	89	93	91	4.9
019	Fresh	EG	35	74	80	78	4.1
020	Fresh	EG	41	85	89	88	4.7
021	Fresh	EG	39	80	84	83	4.5
022	Fresh	EG	44	88	91	90	4.8
023	Fresh	EG	36	75	81	79	4.2
024	Fresh	EG	43	86	90	89	4.7
025	Fresh	EG	37	76	82	80	4.3
026	Fresh	EG	40	82	87	85	4.5
027	Fresh	EG	47	91	96	94	5
028	Fresh	EG	33	71	78	76	4
029	Fresh	EG	42	84	89	87	4.7
030	Fresh	EG	38	78	83	82	4.4
031	Fresh	EG	45	88	92	90	4.8
032	Fresh	EG	35	74	81	79	4.1
033	Fresh	EG	41	85	90	88	4.7
034	Fresh	EG	39	81	85	84	4.5
035	Fresh	EG	44	87	91	89	4.8
036	Fresh	EG	36	75	81	80	4.2
037	Fresh	EG	43	85	89	88	4.7
038	Fresh	EG	37	77	82	81	4.3
039	Fresh	EG	40	82	86	85	4.5
040	Fresh	EG	46	90	94	92	4.9
041	Fresh	EG	34	73	79	78	4.1
042	Fresh	EG	42	83	88	86	4.6
043	Fresh	EG	38	79	84	83	4.4
044	Fresh	EG	45	88	92	90	4.9
045	Fresh	EG	35	74	80	78	4.1
046	Fresh	EG	41	84	89	87	4.7
047	Fresh	EG	39	80	84	83	4.5
048	Fresh	EG	44	87	91	89	4.8
049	Fresh	EG	36	76	82	81	4.2
050	Fresh	EG	43	85	90	88	4.7
051	Fresh	EG	37	77	83	81	4.3
052	Fresh	EG	40	81	87	85	4.5
053	Fresh	EG	46	91	95	93	5
054	Fresh	EG	34	72	78	77	4
055	Fresh	EG	42	83	88	86	4.6
056	Fresh	EG	38	79	84	82	4.4
057	Fresh	EG	45	89	93	91	4.9
058	Fresh	EG	35	74	81	79	4.1
059	Fresh	EG	41	85	89	88	4.7
060	Fresh	EG	39	81	85	84	4.5
061	Fresh	EG	44	88	92	90	4.8
062	Fresh	EG	36	75	82	80	4.2
063	Fresh	EG	43	86	90	89	4.7
064	Fresh	EG	37	76	82	81	4.3
065	Fresh	EG	40	82	87	85	4.5
066	Fresh	EG	47	91	96	94	5
067	Fresh	EG	33	71	78	76	4
068	Fresh	EG	42	84	89	87	4.7
069	Fresh	EG	38	78	83	82	4.4
070	Fresh	EG	45	88	92	90	4.8
071	Fresh	EG	35	74	81	79	4.1
072	Fresh	EG	41	85	90	88	4.7
073	Fresh	EG	39	81	85	84	4.5
074	Fresh	EG	44	87	91	89	4.8
075	Fresh	EG	36	75	81	80	4.2
076	Fresh	EG	43	85	89	88	4.7
077	Fresh	EG	37	77	82	81	4.3
078	Fresh	EG	40	82	86	85	4.5
079	Fresh	EG	46	90	94	92	4.9
080	Fresh	EG	34	73	79	78	4.1
081	Fresh	EG	42	83	88	86	4.6
082	Fresh	EG	38	79	84	83	4.4
083	Fresh	EG	45	88	92	90	4.9
084	Fresh	EG	35	74	80	78	4.1
085	Fresh	EG	41	84	89	87	4.7
086	Fresh	EG	39	80	84	83	4.5
087	Fresh	EG	44	87	91	89	4.8
088	Fresh	EG	36	76	82	81	4.2
089	Fresh	EG	43	85	90	88	4.7
090	Fresh	EG	37	77	83	81	4.3
091	Fresh	EG	40	81	87	85	4.5
092	Fresh	EG	46	91	95	93	5
093	Fresh	EG	34	72	78	77	4
094	Fresh	EG	42	83	88	86	4.6
095	Fresh	EG	38	79	84	82	4.4
096	Fresh	EG	45	89	93	91	4.9
097	Fresh	EG	35	74	81	79	4.1
098	Fresh	EG	41	85	89	88	4.7
099	Fresh	EG	39	81	85	84	4.5
100	Fresh	EG	44	88	92	90	4.8
101	Fresh	EG	36	75	82	80	4.2
102	Fresh	EG	43	86	90	89	4.7
103	Fresh	EG	37	76	82	81	4.3
104	Fresh	EG	40	82	87	85	4.5
105	Fresh	EG	47	91	96	94	5
106	Fresh	EG	33	71	78	76	4
107	Fresh	EG	42	84	89	87	4.7
108	Fresh	EG	38	78	83	82	4.4
109	Fresh	EG	45	88	92	90	4.8
110	Fresh	EG	35	74	81	79	4.1
111	Fresh	EG	41	85	90	88	4.7
112	Fresh	CG	42	55	40	0	0
113	Fresh	CG	38	60	35	0	0
114	Fresh	CG	40	58	42	0	0
115	Fresh	CG	41	56	38	0	0
116	Fresh	CG	44	62	45	0	0
117	Fresh	CG	35	50	33	0	0
118	Fresh	CG	39	57	40	0	0
119	Fresh	CG	37	55	38	0	0
120	Fresh	CG	43	61	44	0	0
121	Fresh	CG	36	53	36	0	0
122	Fresh	CG	42	58	41	0	0
123	Fresh	CG	38	54	35	0	0
124	Fresh	CG	40	59	42	0	0
125	Fresh	CG	45	64	48	0	0
126	Fresh	CG	34	48	32	0	0
127	Fresh	CG	41	57	39	0	0
128	Fresh	CG	39	56	40	0	0
129	Fresh	CG	44	62	46	0	0
130	Fresh	CG	35	51	34	0	0
131	Fresh	CG	42	58	41	0	0
132	Fresh	CG	38	54	35	0	0
133	Fresh	CG	40	59	42	0	0
134	Fresh	CG	46	65	50	0	0
135	Fresh	CG	33	47	31	0	0
136	Fresh	CG	41	56	38	0	0
137	Fresh	CG	39	55	39	0	0
138	Fresh	CG	44	61	45	0	0
139	Fresh	CG	35	52	35	0	0
140	Fresh	CG	41	57	40	0	0
141	Fresh	CG	39	54	37	0	0
142	Fresh	CG	44	62	46	0	0
143	Fresh	CG	36	53	36	0	0
144	Fresh	CG	43	60	43	0	0
145	Fresh	CG	37	55	38	0	0
146	Fresh	CG	40	58	41	0	0
147	Fresh	CG	46	64	49	0	0
148	Fresh	CG	34	49	33	0	0
149	Fresh	CG	42	57	40	0	0
150	Fresh	CG	38	55	36	0	0
151	Fresh	CG	45	63	47	0	0
152	Fresh	CG	35	51	34	0	0
153	Fresh	CG	41	58	41	0	0
154	Fresh	CG	39	56	38	0	0
155	Fresh	CG	44	62	46	0	0
156	Fresh	CG	36	52	36	0	0
157	Fresh	CG	43	61	44	0	0
158	Fresh	CG	37	55	38	0	0
159	Fresh	CG	40	59	42	0	0
160	Fresh	CG	46	65	50	0	0
161	Fresh	CG	33	47	31	0	0
162	Fresh	CG	41	56	38	0	0
163	Fresh	CG	39	55	39	0	0
164	Fresh	CG	44	61	45	0	0
165	Fresh	CG	35	52	35	0	0
166	Fresh	CG	41	57	40	0	0
167	Fresh	CG	39	54	37	0	0
168	Fresh	CG	44	62	46	0	0
169	Fresh	CG	36	53	36	0	0
170	Fresh	CG	43	60	43	0	0
171	Fresh	CG	37	55	38	0	0
172	Fresh	CG	40	58	41	0	0
173	Fresh	CG	46	64	49	0	0
174	Fresh	CG	34	49	33	0	0
175	Fresh	CG	42	57	40	0	0
176	Fresh	CG	38	55	36	0	0
177	Fresh	CG	45	63	47	0	0
178	Fresh	CG	35	51	34	0	0
179	Fresh	CG	41	58	41	0	0
180	Fresh	CG	39	56	38	0	0
181	Fresh	CG	44	62	46	0	0
182	Fresh	CG	36	52	36	0	0
183	Fresh	CG	43	61	44	0	0
184	Fresh	CG	37	55	38	0	0
185	Fresh	CG	40	59	42	0	0
186	Fresh	CG	46	65	50	0	0
187	Fresh	CG	33	47	31	0	0
188	Fresh	CG	41	56	38	0	0
189	Fresh	CG	39	55	39	0	0
190	Fresh	CG	44	61	45	0	0
191	Fresh	CG	35	52	35	0	0
192	Fresh	CG	41	57	40	0	0
193	Fresh	CG	39	54	37	0	0
194	Fresh	CG	44	62	46	0	0
195	Fresh	CG	36	53	36	0	0
196	Fresh	CG	43	60	43	0	0
197	Fresh	CG	37	55	38	0	0
198	Fresh	CG	40	58	41	0	0
199	Fresh	CG	46	64	49	0	0
200	Fresh	CG	34	49	33	0	0
201	Fresh	CG	42	57	40	0	0
202	Fresh	CG	38	55	36	0	0
203	Fresh	CG	45	63	47	0	0
204	Fresh	CG	35	51	34	0	0
205	Fresh	CG	41	58	41	0	0
206	Fresh	CG	39	56	38	0	0
207	Fresh	CG	44	62	46	0	0
208	Fresh	CG	36	52	36	0	0
209	Fresh	CG	43	61	44	0	0
210	Fresh	CG	37	55	38	0	0
211	Fresh	CG	40	59	42	0	0
212	Fresh	CG	46	65	50	0	0
213	Fresh	CG	33	47	31	0	0
214	Fresh	CG	41	56	38	0	0
215	Fresh	CG	39	55	39	0	0
216	Fresh	CG	44	61	45	0	0
217	Fresh	CG	35	52	35	0	0
218	Fresh	CG	41	57	40	0	0
219	Fresh	CG	39	54	37	0	0
220	Fresh	CG	44	62	46	0	0
221	Fresh	CG	36	53	36	0	0
222	Fresh	CG	43	60	43	0	0
223	Soph	EG	55	92	95	94	5
224	Soph	EG	50	88	90	90	4.5
225	Soph	EG	52	90	93	92	4.8
226	Soph	EG	53	91	94	93	4.9
227	Soph	EG	56	94	98	96	5
228	Soph	EG	48	84	88	86	4.3
229	Soph	EG	51	89	92	91	4.7
230	Soph	EG	49	86	90	88	4.5
231	Soph	EG	54	92	95	94	4.9
232	Soph	EG	47	82	86	84	4.2
233	Soph	EG	53	90	93	92	4.8
234	Soph	EG	50	87	91	89	4.6
235	Soph	EG	52	89	92	91	4.7
236	Soph	EG	55	93	97	95	5
237	Soph	EG	46	80	85	83	4.1
238	Soph	EG	51	88	92	90	4.7
239	Soph	EG	49	85	89	87	4.5
240	Soph	EG	54	92	96	94	4.9
241	Soph	EG	47	81	86	84	4.2
242	Soph	EG	53	91	94	93	4.8
243	Soph	EG	50	88	91	90	4.6
244	Soph	EG	52	90	93	92	4.7
245	Soph	EG	56	95	99	97	5
246	Soph	EG	45	80	84	82	4
247	Soph	EG	51	87	91	89	4.6
248	Soph	EG	49	85	89	87	4.5
249	Soph	EG	54	92	96	94	4.9
250	Soph	EG	47	82	87	85	4.2
251	Soph	EG	53	91	95	93	4.8
252	Soph	EG	50	87	91	89	4.6
253	Soph	EG	52	89	93	91	4.7
254	Soph	EG	55	93	97	95	5
255	Soph	EG	46	81	85	83	4.1
256	Soph	EG	51	88	92	90	4.7
257	Soph	EG	49	86	90	88	4.5
258	Soph	EG	54	92	96	94	4.9
259	Soph	EG	47	82	86	84	4.2
260	Soph	EG	53	90	94	92	4.8
261	Soph	EG	50	87	91	89	4.6
262	Soph	EG	52	89	92	91	4.7
263	Soph	EG	56	94	98	96	5
264	Soph	EG	45	79	84	82	4
265	Soph	EG	51	88	92	90	4.7
266	Soph	EG	49	85	89	87	4.5
267	Soph	EG	54	92	95	94	4.9
268	Soph	EG	47	82	87	85	4.2
269	Soph	EG	53	91	95	93	4.8
270	Soph	EG	50	87	91	89	4.6
271	Soph	EG	52	89	93	91	4.7
272	Soph	EG	55	93	97	95	5
273	Soph	EG	46	81	85	83	4.1
274	Soph	EG	51	88	92	90	4.7
275	Soph	EG	49	86	90	88	4.5
276	Soph	EG	54	92	96	94	4.9
277	Soph	EG	47	82	86	84	4.2
278	Soph	EG	53	90	94	92	4.8
279	Soph	EG	50	87	91	89	4.6
280	Soph	EG	52	89	92	91	4.7
281	Soph	EG	56	94	98	96	5
282	Soph	EG	45	79	84	82	4
283	Soph	EG	51	88	92	90	4.7
284	Soph	EG	49	85	89	87	4.5
285	Soph	EG	54	92	95	94	4.9
286	Soph	EG	47	82	87	85	4.2
287	Soph	EG	53	91	95	93	4.8
288	Soph	CG	52	70	55	0	0
289	Soph	CG	48	65	50	0	0
290	Soph	CG	50	68	52	0	0
291	Soph	CG	51	69	54	0	0
292	Soph	CG	54	72	58	0	0
293	Soph	CG	46	60	48	0	0
294	Soph	CG	50	67	53	0	0
295	Soph	CG	49	66	51	0	0
296	Soph	CG	53	71	57	0	0
297	Soph	CG	45	61	47	0	0
298	Soph	CG	51	68	54	0	0
299	Soph	CG	49	65	51	0	0
300	Soph	CG	52	70	55	0	0
301	Soph	CG	55	73	60	0	0
302	Soph	CG	44	58	45	0	0
303	Soph	CG	50	67	52	0	0
304	Soph	CG	48	64	50	0	0
305	Soph	CG	53	72	56	0	0
306	Soph	CG	46	62	49	0	0
307	Soph	CG	51	69	54	0	0
308	Soph	CG	49	66	52	0	0
309	Soph	CG	52	71	55	0	0
310	Soph	CG	54	73	59	0	0
311	Soph	CG	45	61	48	0	0
312	Soph	CG	50	68	52	0	0
313	Soph	CG	48	65	51	0	0
314	Soph	CG	53	72	57	0	0
315	Soph	CG	46	62	49	0	0
316	Soph	CG	51	69	54	0	0
317	Soph	CG	49	67	52	0	0
318	Soph	CG	52	70	55	0	0
319	Soph	CG	55	74	60	0	0
320	Soph	CG	44	59	46	0	0
321	Soph	CG	50	68	53	0	0
322	Soph	CG	48	64	50	0	0
323	Soph	CG	53	72	58	0	0
324	Soph	CG	46	63	50	0	0
325	Soph	CG	51	69	55	0	0
326	Soph	CG	49	67	53	0	0
327	Soph	CG	52	71	56	0	0
328	Soph	CG	54	74	59	0	0
329	Soph	CG	45	62	48	0	0
330	Soph	CG	50	68	53	0	0
331	Soph	CG	48	65	51	0	0
332	Soph	CG	53	72	57	0	0
333	Soph	CG	46	62	50	0	0
334	Soph	CG	51	69	54	0	0
335	Soph	CG	49	67	52	0	0
336	Soph	CG	52	70	55	0	0
337	Soph	CG	55	74	61	0	0
338	Soph	CG	44	59	47	0	0
339	Soph	CG	50	68	54	0	0
340	Soph	CG	48	65	51	0	0
341	Soph	CG	53	72	58	0	0
342	Soph	CG	46	63	50	0	0
343	Soph	CG	51	70	55	0	0
344	Soph	CG	49	67	52	0	0
345	Soph	CG	52	71	56	0	0
346	Soph	CG	54	74	59	0	0
347	Soph	CG	45	62	49	0	0
348	Soph	CG	50	68	54	0	0
349	Soph	CG	48	65	51	0	0
350	Soph	CG	53	72	57	0	0
351	Soph	CG	46	62	50	0	0
352	Soph	CG	51	69	54	0	0
353	Soph	CG	49	67	52	0	0

## Sheet: Clean_Analysis
Student ID	Year	Group	Pre-Test	Post-Test	Transfer-Task	Physics-Score	Reflection	Gain Score	Normalized Gain	Physics Included	Reflection Included	Physics Analysis	Reflection Analysis	Transfer Benchmark	Notes
001	Fresh	EG	40	85	90	88	4.8	45	0.75	Yes	Yes	88	4.8	Meets
002	Fresh	EG	35	75	80	82	4.2	40	0.615385	Yes	Yes	82	4.2	Meets
003	Fresh	EG	38	78	85	84	4.5	40	0.645161	Yes	Yes	84	4.5	Meets
004	Fresh	EG	42	82	88	86	4.6	40	0.689655	Yes	Yes	86	4.6	Meets
005	Fresh	EG	45	88	92	90	4.9	43	0.781818	Yes	Yes	90	4.9	Meets
006	Fresh	EG	33	70	78	75	4	37	0.552239	Yes	Yes	75	4	Meets
007	Fresh	EG	41	84	89	87	4.7	43	0.728814	Yes	Yes	87	4.7	Meets
008	Fresh	EG	39	80	84	83	4.4	41	0.672131	Yes	Yes	83	4.4	Meets
009	Fresh	EG	44	87	91	89	4.8	43	0.767857	Yes	Yes	89	4.8	Meets
010	Fresh	EG	36	76	81	80	4.2	40	0.625	Yes	Yes	80	4.2	Meets
011	Fresh	EG	43	85	90	88	4.7	42	0.736842	Yes	Yes	88	4.7	Meets
012	Fresh	EG	37	77	82	81	4.3	40	0.634921	Yes	Yes	81	4.3	Meets
013	Fresh	EG	40	81	87	85	4.5	41	0.683333	Yes	Yes	85	4.5	Meets
014	Fresh	EG	46	90	95	92	5	44	0.814815	Yes	Yes	92	5	Meets
015	Fresh	EG	34	72	79	77	4.1	38	0.575758	Yes	Yes	77	4.1	Meets
016	Fresh	EG	42	83	88	86	4.6	41	0.706897	Yes	Yes	86	4.6	Meets
017	Fresh	EG	38	79	83	82	4.4	41	0.66129	Yes	Yes	82	4.4	Meets
018	Fresh	EG	45	89	93	91	4.9	44	0.8	Yes	Yes	91	4.9	Meets
019	Fresh	EG	35	74	80	78	4.1	39	0.6	Yes	Yes	78	4.1	Meets
020	Fresh	EG	41	85	89	88	4.7	44	0.745763	Yes	Yes	88	4.7	Meets
021	Fresh	EG	39	80	84	83	4.5	41	0.672131	Yes	Yes	83	4.5	Meets
022	Fresh	EG	44	88	91	90	4.8	44	0.785714	Yes	Yes	90	4.8	Meets
023	Fresh	EG	36	75	81	79	4.2	39	0.609375	Yes	Yes	79	4.2	Meets
024	Fresh	EG	43	86	90	89	4.7	43	0.754386	Yes	Yes	89	4.7	Meets
025	Fresh	EG	37	76	82	80	4.3	39	0.619048	Yes	Yes	80	4.3	Meets
026	Fresh	EG	40	82	87	85	4.5	42	0.7	Yes	Yes	85	4.5	Meets
027	Fresh	EG	47	91	96	94	5	44	0.830189	Yes	Yes	94	5	Meets
028	Fresh	EG	33	71	78	76	4	38	0.567164	Yes	Yes	76	4	Meets
029	Fresh	EG	42	84	89	87	4.7	42	0.724138	Yes	Yes	87	4.7	Meets
030	Fresh	EG	38	78	83	82	4.4	40	0.645161	Yes	Yes	82	4.4	Meets
031	Fresh	EG	45	88	92	90	4.8	43	0.781818	Yes	Yes	90	4.8	Meets
032	Fresh	EG	35	74	81	79	4.1	39	0.6	Yes	Yes	79	4.1	Meets
033	Fresh	EG	41	85	90	88	4.7	44	0.745763	Yes	Yes	88	4.7	Meets
034	Fresh	EG	39	81	85	84	4.5	42	0.688525	Yes	Yes	84	4.5	Meets
035	Fresh	EG	44	87	91	89	4.8	43	0.767857	Yes	Yes	89	4.8	Meets
036	Fresh	EG	36	75	81	80	4.2	39	0.609375	Yes	Yes	80	4.2	Meets
037	Fresh	EG	43	85	89	88	4.7	42	0.736842	Yes	Yes	88	4.7	Meets
038	Fresh	EG	37	77	82	81	4.3	40	0.634921	Yes	Yes	81	4.3	Meets
039	Fresh	EG	40	82	86	85	4.5	42	0.7	Yes	Yes	85	4.5	Meets
040	Fresh	EG	46	90	94	92	4.9	44	0.814815	Yes	Yes	92	4.9	Meets
041	Fresh	EG	34	73	79	78	4.1	39	0.590909	Yes	Yes	78	4.1	Meets
042	Fresh	EG	42	83	88	86	4.6	41	0.706897	Yes	Yes	86	4.6	Meets
043	Fresh	EG	38	79	84	83	4.4	41	0.66129	Yes	Yes	83	4.4	Meets
044	Fresh	EG	45	88	92	90	4.9	43	0.781818	Yes	Yes	90	4.9	Meets
045	Fresh	EG	35	74	80	78	4.1	39	0.6	Yes	Yes	78	4.1	Meets
046	Fresh	EG	41	84	89	87	4.7	43	0.728814	Yes	Yes	87	4.7	Meets
047	Fresh	EG	39	80	84	83	4.5	41	0.672131	Yes	Yes	83	4.5	Meets
048	Fresh	EG	44	87	91	89	4.8	43	0.767857	Yes	Yes	89	4.8	Meets
049	Fresh	EG	36	76	82	81	4.2	40	0.625	Yes	Yes	81	4.2	Meets
050	Fresh	EG	43	85	90	88	4.7	42	0.736842	Yes	Yes	88	4.7	Meets
051	Fresh	EG	37	77	83	81	4.3	40	0.634921	Yes	Yes	81	4.3	Meets
052	Fresh	EG	40	81	87	85	4.5	41	0.683333	Yes	Yes	85	4.5	Meets
053	Fresh	EG	46	91	95	93	5	45	0.833333	Yes	Yes	93	5	Meets
054	Fresh	EG	34	72	78	77	4	38	0.575758	Yes	Yes	77	4	Meets
055	Fresh	EG	42	83	88	86	4.6	41	0.706897	Yes	Yes	86	4.6	Meets
056	Fresh	EG	38	79	84	82	4.4	41	0.66129	Yes	Yes	82	4.4	Meets
057	Fresh	EG	45	89	93	91	4.9	44	0.8	Yes	Yes	91	4.9	Meets
058	Fresh	EG	35	74	81	79	4.1	39	0.6	Yes	Yes	79	4.1	Meets
059	Fresh	EG	41	85	89	88	4.7	44	0.745763	Yes	Yes	88	4.7	Meets
060	Fresh	EG	39	81	85	84	4.5	42	0.688525	Yes	Yes	84	4.5	Meets
061	Fresh	EG	44	88	92	90	4.8	44	0.785714	Yes	Yes	90	4.8	Meets
062	Fresh	EG	36	75	82	80	4.2	39	0.609375	Yes	Yes	80	4.2	Meets
063	Fresh	EG	43	86	90	89	4.7	43	0.754386	Yes	Yes	89	4.7	Meets
064	Fresh	EG	37	76	82	81	4.3	39	0.619048	Yes	Yes	81	4.3	Meets
065	Fresh	EG	40	82	87	85	4.5	42	0.7	Yes	Yes	85	4.5	Meets
066	Fresh	EG	47	91	96	94	5	44	0.830189	Yes	Yes	94	5	Meets
067	Fresh	EG	33	71	78	76	4	38	0.567164	Yes	Yes	76	4	Meets
068	Fresh	EG	42	84	89	87	4.7	42	0.724138	Yes	Yes	87	4.7	Meets
069	Fresh	EG	38	78	83	82	4.4	40	0.645161	Yes	Yes	82	4.4	Meets
070	Fresh	EG	45	88	92	90	4.8	43	0.781818	Yes	Yes	90	4.8	Meets
071	Fresh	EG	35	74	81	79	4.1	39	0.6	Yes	Yes	79	4.1	Meets
072	Fresh	EG	41	85	90	88	4.7	44	0.745763	Yes	Yes	88	4.7	Meets
073	Fresh	EG	39	81	85	84	4.5	42	0.688525	Yes	Yes	84	4.5	Meets
074	Fresh	EG	44	87	91	89	4.8	43	0.767857	Yes	Yes	89	4.8	Meets
075	Fresh	EG	36	75	81	80	4.2	39	0.609375	Yes	Yes	80	4.2	Meets
076	Fresh	EG	43	85	89	88	4.7	42	0.736842	Yes	Yes	88	4.7	Meets
077	Fresh	EG	37	77	82	81	4.3	40	0.634921	Yes	Yes	81	4.3	Meets
078	Fresh	EG	40	82	86	85	4.5	42	0.7	Yes	Yes	85	4.5	Meets
079	Fresh	EG	46	90	94	92	4.9	44	0.814815	Yes	Yes	92	4.9	Meets
080	Fresh	EG	34	73	79	78	4.1	39	0.590909	Yes	Yes	78	4.1	Meets
081	Fresh	EG	42	83	88	86	4.6	41	0.706897	Yes	Yes	86	4.6	Meets
082	Fresh	EG	38	79	84	83	4.4	41	0.66129	Yes	Yes	83	4.4	Meets
083	Fresh	EG	45	88	92	90	4.9	43	0.781818	Yes	Yes	90	4.9	Meets
084	Fresh	EG	35	74	80	78	4.1	39	0.6	Yes	Yes	78	4.1	Meets
085	Fresh	EG	41	84	89	87	4.7	43	0.728814	Yes	Yes	87	4.7	Meets
086	Fresh	EG	39	80	84	83	4.5	41	0.672131	Yes	Yes	83	4.5	Meets
087	Fresh	EG	44	87	91	89	4.8	43	0.767857	Yes	Yes	89	4.8	Meets
088	Fresh	EG	36	76	82	81	4.2	40	0.625	Yes	Yes	81	4.2	Meets
089	Fresh	EG	43	85	90	88	4.7	42	0.736842	Yes	Yes	88	4.7	Meets
090	Fresh	EG	37	77	83	81	4.3	40	0.634921	Yes	Yes	81	4.3	Meets
091	Fresh	EG	40	81	87	85	4.5	41	0.683333	Yes	Yes	85	4.5	Meets
092	Fresh	EG	46	91	95	93	5	45	0.833333	Yes	Yes	93	5	Meets
093	Fresh	EG	34	72	78	77	4	38	0.575758	Yes	Yes	77	4	Meets
094	Fresh	EG	42	83	88	86	4.6	41	0.706897	Yes	Yes	86	4.6	Meets
095	Fresh	EG	38	79	84	82	4.4	41	0.66129	Yes	Yes	82	4.4	Meets
096	Fresh	EG	45	89	93	91	4.9	44	0.8	Yes	Yes	91	4.9	Meets
097	Fresh	EG	35	74	81	79	4.1	39	0.6	Yes	Yes	79	4.1	Meets
098	Fresh	EG	41	85	89	88	4.7	44	0.745763	Yes	Yes	88	4.7	Meets
099	Fresh	EG	39	81	85	84	4.5	42	0.688525	Yes	Yes	84	4.5	Meets
100	Fresh	EG	44	88	92	90	4.8	44	0.785714	Yes	Yes	90	4.8	Meets
101	Fresh	EG	36	75	82	80	4.2	39	0.609375	Yes	Yes	80	4.2	Meets
102	Fresh	EG	43	86	90	89	4.7	43	0.754386	Yes	Yes	89	4.7	Meets
103	Fresh	EG	37	76	82	81	4.3	39	0.619048	Yes	Yes	81	4.3	Meets
104	Fresh	EG	40	82	87	85	4.5	42	0.7	Yes	Yes	85	4.5	Meets
105	Fresh	EG	47	91	96	94	5	44	0.830189	Yes	Yes	94	5	Meets
106	Fresh	EG	33	71	78	76	4	38	0.567164	Yes	Yes	76	4	Meets
107	Fresh	EG	42	84	89	87	4.7	42	0.724138	Yes	Yes	87	4.7	Meets
108	Fresh	EG	38	78	83	82	4.4	40	0.645161	Yes	Yes	82	4.4	Meets
109	Fresh	EG	45	88	92	90	4.8	43	0.781818	Yes	Yes	90	4.8	Meets
110	Fresh	EG	35	74	81	79	4.1	39	0.6	Yes	Yes	79	4.1	Meets
111	Fresh	EG	41	85	90	88	4.7	44	0.745763	Yes	Yes	88	4.7	Meets
112	Fresh	CG	42	55	40	0	0	13	0.224138	No	No			Below
113	Fresh	CG	38	60	35	0	0	22	0.354839	No	No			Below
114	Fresh	CG	40	58	42	0	0	18	0.3	No	No			Below
115	Fresh	CG	41	56	38	0	0	15	0.254237	No	No			Below
116	Fresh	CG	44	62	45	0	0	18	0.321429	No	No			Below
117	Fresh	CG	35	50	33	0	0	15	0.230769	No	No			Below
118	Fresh	CG	39	57	40	0	0	18	0.295082	No	No			Below
119	Fresh	CG	37	55	38	0	0	18	0.285714	No	No			Below
120	Fresh	CG	43	61	44	0	0	18	0.315789	No	No			Below
121	Fresh	CG	36	53	36	0	0	17	0.265625	No	No			Below
122	Fresh	CG	42	58	41	0	0	16	0.275862	No	No			Below
123	Fresh	CG	38	54	35	0	0	16	0.258065	No	No			Below
124	Fresh	CG	40	59	42	0	0	19	0.316667	No	No			Below
125	Fresh	CG	45	64	48	0	0	19	0.345455	No	No			Below
126	Fresh	CG	34	48	32	0	0	14	0.212121	No	No			Below
127	Fresh	CG	41	57	39	0	0	16	0.271186	No	No			Below
128	Fresh	CG	39	56	40	0	0	17	0.278689	No	No			Below
129	Fresh	CG	44	62	46	0	0	18	0.321429	No	No			Below
130	Fresh	CG	35	51	34	0	0	16	0.246154	No	No			Below
131	Fresh	CG	42	58	41	0	0	16	0.275862	No	No			Below
132	Fresh	CG	38	54	35	0	0	16	0.258065	No	No			Below
133	Fresh	CG	40	59	42	0	0	19	0.316667	No	No			Below
134	Fresh	CG	46	65	50	0	0	19	0.351852	No	No			Below
135	Fresh	CG	33	47	31	0	0	14	0.208955	No	No			Below
136	Fresh	CG	41	56	38	0	0	15	0.254237	No	No			Below
137	Fresh	CG	39	55	39	0	0	16	0.262295	No	No			Below
138	Fresh	CG	44	61	45	0	0	17	0.303571	No	No			Below
139	Fresh	CG	35	52	35	0	0	17	0.261538	No	No			Below
140	Fresh	CG	41	57	40	0	0	16	0.271186	No	No			Below
141	Fresh	CG	39	54	37	0	0	15	0.245902	No	No			Below
142	Fresh	CG	44	62	46	0	0	18	0.321429	No	No			Below
143	Fresh	CG	36	53	36	0	0	17	0.265625	No	No			Below
144	Fresh	CG	43	60	43	0	0	17	0.298246	No	No			Below
145	Fresh	CG	37	55	38	0	0	18	0.285714	No	No			Below
146	Fresh	CG	40	58	41	0	0	18	0.3	No	No			Below
147	Fresh	CG	46	64	49	0	0	18	0.333333	No	No			Below
148	Fresh	CG	34	49	33	0	0	15	0.227273	No	No			Below
149	Fresh	CG	42	57	40	0	0	15	0.258621	No	No			Below
150	Fresh	CG	38	55	36	0	0	17	0.274194	No	No			Below
151	Fresh	CG	45	63	47	0	0	18	0.327273	No	No			Below
152	Fresh	CG	35	51	34	0	0	16	0.246154	No	No			Below
153	Fresh	CG	41	58	41	0	0	17	0.288136	No	No			Below
154	Fresh	CG	39	56	38	0	0	17	0.278689	No	No			Below
155	Fresh	CG	44	62	46	0	0	18	0.321429	No	No			Below
156	Fresh	CG	36	52	36	0	0	16	0.25	No	No			Below
157	Fresh	CG	43	61	44	0	0	18	0.315789	No	No			Below
158	Fresh	CG	37	55	38	0	0	18	0.285714	No	No			Below
159	Fresh	CG	40	59	42	0	0	19	0.316667	No	No			Below
160	Fresh	CG	46	65	50	0	0	19	0.351852	No	No			Below
161	Fresh	CG	33	47	31	0	0	14	0.208955	No	No			Below
162	Fresh	CG	41	56	38	0	0	15	0.254237	No	No			Below
163	Fresh	CG	39	55	39	0	0	16	0.262295	No	No			Below
164	Fresh	CG	44	61	45	0	0	17	0.303571	No	No			Below
165	Fresh	CG	35	52	35	0	0	17	0.261538	No	No			Below
166	Fresh	CG	41	57	40	0	0	16	0.271186	No	No			Below
167	Fresh	CG	39	54	37	0	0	15	0.245902	No	No			Below
168	Fresh	CG	44	62	46	0	0	18	0.321429	No	No			Below
169	Fresh	CG	36	53	36	0	0	17	0.265625	No	No			Below
170	Fresh	CG	43	60	43	0	0	17	0.298246	No	No			Below
171	Fresh	CG	37	55	38	0	0	18	0.285714	No	No			Below
172	Fresh	CG	40	58	41	0	0	18	0.3	No	No			Below
173	Fresh	CG	46	64	49	0	0	18	0.333333	No	No			Below
174	Fresh	CG	34	49	33	0	0	15	0.227273	No	No			Below
175	Fresh	CG	42	57	40	0	0	15	0.258621	No	No			Below
176	Fresh	CG	38	55	36	0	0	17	0.274194	No	No			Below
177	Fresh	CG	45	63	47	0	0	18	0.327273	No	No			Below
178	Fresh	CG	35	51	34	0	0	16	0.246154	No	No			Below
179	Fresh	CG	41	58	41	0	0	17	0.288136	No	No			Below
180	Fresh	CG	39	56	38	0	0	17	0.278689	No	No			Below
181	Fresh	CG	44	62	46	0	0	18	0.321429	No	No			Below
182	Fresh	CG	36	52	36	0	0	16	0.25	No	No			Below
183	Fresh	CG	43	61	44	0	0	18	0.315789	No	No			Below
184	Fresh	CG	37	55	38	0	0	18	0.285714	No	No			Below
185	Fresh	CG	40	59	42	0	0	19	0.316667	No	No			Below
186	Fresh	CG	46	65	50	0	0	19	0.351852	No	No			Below
187	Fresh	CG	33	47	31	0	0	14	0.208955	No	No			Below
188	Fresh	CG	41	56	38	0	0	15	0.254237	No	No			Below
189	Fresh	CG	39	55	39	0	0	16	0.262295	No	No			Below
190	Fresh	CG	44	61	45	0	0	17	0.303571	No	No			Below
191	Fresh	CG	35	52	35	0	0	17	0.261538	No	No			Below
192	Fresh	CG	41	57	40	0	0	16	0.271186	No	No			Below
193	Fresh	CG	39	54	37	0	0	15	0.245902	No	No			Below
194	Fresh	CG	44	62	46	0	0	18	0.321429	No	No			Below
195	Fresh	CG	36	53	36	0	0	17	0.265625	No	No			Below
196	Fresh	CG	43	60	43	0	0	17	0.298246	No	No			Below
197	Fresh	CG	37	55	38	0	0	18	0.285714	No	No			Below
198	Fresh	CG	40	58	41	0	0	18	0.3	No	No			Below
199	Fresh	CG	46	64	49	0	0	18	0.333333	No	No			Below
200	Fresh	CG	34	49	33	0	0	15	0.227273	No	No			Below
201	Fresh	CG	42	57	40	0	0	15	0.258621	No	No			Below
202	Fresh	CG	38	55	36	0	0	17	0.274194	No	No			Below
203	Fresh	CG	45	63	47	0	0	18	0.327273	No	No			Below
204	Fresh	CG	35	51	34	0	0	16	0.246154	No	No			Below
205	Fresh	CG	41	58	41	0	0	17	0.288136	No	No			Below
206	Fresh	CG	39	56	38	0	0	17	0.278689	No	No			Below
207	Fresh	CG	44	62	46	0	0	18	0.321429	No	No			Below
208	Fresh	CG	36	52	36	0	0	16	0.25	No	No			Below
209	Fresh	CG	43	61	44	0	0	18	0.315789	No	No			Below
210	Fresh	CG	37	55	38	0	0	18	0.285714	No	No			Below
211	Fresh	CG	40	59	42	0	0	19	0.316667	No	No			Below
212	Fresh	CG	46	65	50	0	0	19	0.351852	No	No			Below
213	Fresh	CG	33	47	31	0	0	14	0.208955	No	No			Below
214	Fresh	CG	41	56	38	0	0	15	0.254237	No	No			Below
215	Fresh	CG	39	55	39	0	0	16	0.262295	No	No			Below
216	Fresh	CG	44	61	45	0	0	17	0.303571	No	No			Below
217	Fresh	CG	35	52	35	0	0	17	0.261538	No	No			Below
218	Fresh	CG	41	57	40	0	0	16	0.271186	No	No			Below
219	Fresh	CG	39	54	37	0	0	15	0.245902	No	No			Below
220	Fresh	CG	44	62	46	0	0	18	0.321429	No	No			Below
221	Fresh	CG	36	53	36	0	0	17	0.265625	No	No			Below
222	Fresh	CG	43	60	43	0	0	17	0.298246	No	No			Below
223	Soph	EG	55	92	95	94	5	37	0.822222	Yes	Yes	94	5	Meets
224	Soph	EG	50	88	90	90	4.5	38	0.76	Yes	Yes	90	4.5	Meets
225	Soph	EG	52	90	93	92	4.8	38	0.791667	Yes	Yes	92	4.8	Meets
226	Soph	EG	53	91	94	93	4.9	38	0.808511	Yes	Yes	93	4.9	Meets
227	Soph	EG	56	94	98	96	5	38	0.863636	Yes	Yes	96	5	Meets
228	Soph	EG	48	84	88	86	4.3	36	0.692308	Yes	Yes	86	4.3	Meets
229	Soph	EG	51	89	92	91	4.7	38	0.77551	Yes	Yes	91	4.7	Meets
230	Soph	EG	49	86	90	88	4.5	37	0.72549	Yes	Yes	88	4.5	Meets
231	Soph	EG	54	92	95	94	4.9	38	0.826087	Yes	Yes	94	4.9	Meets
232	Soph	EG	47	82	86	84	4.2	35	0.660377	Yes	Yes	84	4.2	Meets
233	Soph	EG	53	90	93	92	4.8	37	0.787234	Yes	Yes	92	4.8	Meets
234	Soph	EG	50	87	91	89	4.6	37	0.74	Yes	Yes	89	4.6	Meets
235	Soph	EG	52	89	92	91	4.7	37	0.770833	Yes	Yes	91	4.7	Meets
236	Soph	EG	55	93	97	95	5	38	0.844444	Yes	Yes	95	5	Meets
237	Soph	EG	46	80	85	83	4.1	34	0.62963	Yes	Yes	83	4.1	Meets
238	Soph	EG	51	88	92	90	4.7	37	0.755102	Yes	Yes	90	4.7	Meets
239	Soph	EG	49	85	89	87	4.5	36	0.705882	Yes	Yes	87	4.5	Meets
240	Soph	EG	54	92	96	94	4.9	38	0.826087	Yes	Yes	94	4.9	Meets
241	Soph	EG	47	81	86	84	4.2	34	0.641509	Yes	Yes	84	4.2	Meets
242	Soph	EG	53	91	94	93	4.8	38	0.808511	Yes	Yes	93	4.8	Meets
243	Soph	EG	50	88	91	90	4.6	38	0.76	Yes	Yes	90	4.6	Meets
244	Soph	EG	52	90	93	92	4.7	38	0.791667	Yes	Yes	92	4.7	Meets
245	Soph	EG	56	95	99	97	5	39	0.886364	Yes	Yes	97	5	Meets
246	Soph	EG	45	80	84	82	4	35	0.636364	Yes	Yes	82	4	Meets
247	Soph	EG	51	87	91	89	4.6	36	0.734694	Yes	Yes	89	4.6	Meets
248	Soph	EG	49	85	89	87	4.5	36	0.705882	Yes	Yes	87	4.5	Meets
249	Soph	EG	54	92	96	94	4.9	38	0.826087	Yes	Yes	94	4.9	Meets
250	Soph	EG	47	82	87	85	4.2	35	0.660377	Yes	Yes	85	4.2	Meets
251	Soph	EG	53	91	95	93	4.8	38	0.808511	Yes	Yes	93	4.8	Meets
252	Soph	EG	50	87	91	89	4.6	37	0.74	Yes	Yes	89	4.6	Meets
253	Soph	EG	52	89	93	91	4.7	37	0.770833	Yes	Yes	91	4.7	Meets
254	Soph	EG	55	93	97	95	5	38	0.844444	Yes	Yes	95	5	Meets
255	Soph	EG	46	81	85	83	4.1	35	0.648148	Yes	Yes	83	4.1	Meets
256	Soph	EG	51	88	92	90	4.7	37	0.755102	Yes	Yes	90	4.7	Meets
257	Soph	EG	49	86	90	88	4.5	37	0.72549	Yes	Yes	88	4.5	Meets
258	Soph	EG	54	92	96	94	4.9	38	0.826087	Yes	Yes	94	4.9	Meets
259	Soph	EG	47	82	86	84	4.2	35	0.660377	Yes	Yes	84	4.2	Meets
260	Soph	EG	53	90	94	92	4.8	37	0.787234	Yes	Yes	92	4.8	Meets
261	Soph	EG	50	87	91	89	4.6	37	0.74	Yes	Yes	89	4.6	Meets
262	Soph	EG	52	89	92	91	4.7	37	0.770833	Yes	Yes	91	4.7	Meets
263	Soph	EG	56	94	98	96	5	38	0.863636	Yes	Yes	96	5	Meets
264	Soph	EG	45	79	84	82	4	34	0.618182	Yes	Yes	82	4	Meets
265	Soph	EG	51	88	92	90	4.7	37	0.755102	Yes	Yes	90	4.7	Meets
266	Soph	EG	49	85	89	87	4.5	36	0.705882	Yes	Yes	87	4.5	Meets
267	Soph	EG	54	92	95	94	4.9	38	0.826087	Yes	Yes	94	4.9	Meets
268	Soph	EG	47	82	87	85	4.2	35	0.660377	Yes	Yes	85	4.2	Meets
269	Soph	EG	53	91	95	93	4.8	38	0.808511	Yes	Yes	93	4.8	Meets
270	Soph	EG	50	87	91	89	4.6	37	0.74	Yes	Yes	89	4.6	Meets
271	Soph	EG	52	89	93	91	4.7	37	0.770833	Yes	Yes	91	4.7	Meets
272	Soph	EG	55	93	97	95	5	38	0.844444	Yes	Yes	95	5	Meets
273	Soph	EG	46	81	85	83	4.1	35	0.648148	Yes	Yes	83	4.1	Meets
274	Soph	EG	51	88	92	90	4.7	37	0.755102	Yes	Yes	90	4.7	Meets
275	Soph	EG	49	86	90	88	4.5	37	0.72549	Yes	Yes	88	4.5	Meets
276	Soph	EG	54	92	96	94	4.9	38	0.826087	Yes	Yes	94	4.9	Meets
277	Soph	EG	47	82	86	84	4.2	35	0.660377	Yes	Yes	84	4.2	Meets
278	Soph	EG	53	90	94	92	4.8	37	0.787234	Yes	Yes	92	4.8	Meets
279	Soph	EG	50	87	91	89	4.6	37	0.74	Yes	Yes	89	4.6	Meets
280	Soph	EG	52	89	92	91	4.7	37	0.770833	Yes	Yes	91	4.7	Meets
281	Soph	EG	56	94	98	96	5	38	0.863636	Yes	Yes	96	5	Meets
282	Soph	EG	45	79	84	82	4	34	0.618182	Yes	Yes	82	4	Meets
283	Soph	EG	51	88	92	90	4.7	37	0.755102	Yes	Yes	90	4.7	Meets
284	Soph	EG	49	85	89	87	4.5	36	0.705882	Yes	Yes	87	4.5	Meets
285	Soph	EG	54	92	95	94	4.9	38	0.826087	Yes	Yes	94	4.9	Meets
286	Soph	EG	47	82	87	85	4.2	35	0.660377	Yes	Yes	85	4.2	Meets
287	Soph	EG	53	91	95	93	4.8	38	0.808511	Yes	Yes	93	4.8	Meets
288	Soph	CG	52	70	55	0	0	18	0.375	No	No			Below
289	Soph	CG	48	65	50	0	0	17	0.326923	No	No			Below
290	Soph	CG	50	68	52	0	0	18	0.36	No	No			Below
291	Soph	CG	51	69	54	0	0	18	0.367347	No	No			Below
292	Soph	CG	54	72	58	0	0	18	0.391304	No	No			Below
293	Soph	CG	46	60	48	0	0	14	0.259259	No	No			Below
294	Soph	CG	50	67	53	0	0	17	0.34	No	No			Below
295	Soph	CG	49	66	51	0	0	17	0.333333	No	No			Below
296	Soph	CG	53	71	57	0	0	18	0.382979	No	No			Below
297	Soph	CG	45	61	47	0	0	16	0.290909	No	No			Below
298	Soph	CG	51	68	54	0	0	17	0.346939	No	No			Below
299	Soph	CG	49	65	51	0	0	16	0.313725	No	No			Below
300	Soph	CG	52	70	55	0	0	18	0.375	No	No			Below
301	Soph	CG	55	73	60	0	0	18	0.4	No	No			Below
302	Soph	CG	44	58	45	0	0	14	0.25	No	No			Below
303	Soph	CG	50	67	52	0	0	17	0.34	No	No			Below
304	Soph	CG	48	64	50	0	0	16	0.307692	No	No			Below
305	Soph	CG	53	72	56	0	0	19	0.404255	No	No			Below
306	Soph	CG	46	62	49	0	0	16	0.296296	No	No			Below
307	Soph	CG	51	69	54	0	0	18	0.367347	No	No			Below
308	Soph	CG	49	66	52	0	0	17	0.333333	No	No			Below
309	Soph	CG	52	71	55	0	0	19	0.395833	No	No			Below
310	Soph	CG	54	73	59	0	0	19	0.413043	No	No			Below
311	Soph	CG	45	61	48	0	0	16	0.290909	No	No			Below
312	Soph	CG	50	68	52	0	0	18	0.36	No	No			Below
313	Soph	CG	48	65	51	0	0	17	0.326923	No	No			Below
314	Soph	CG	53	72	57	0	0	19	0.404255	No	No			Below
315	Soph	CG	46	62	49	0	0	16	0.296296	No	No			Below
316	Soph	CG	51	69	54	0	0	18	0.367347	No	No			Below
317	Soph	CG	49	67	52	0	0	18	0.352941	No	No			Below
318	Soph	CG	52	70	55	0	0	18	0.375	No	No			Below
319	Soph	CG	55	74	60	0	0	19	0.422222	No	No			Below
320	Soph	CG	44	59	46	0	0	15	0.267857	No	No			Below
321	Soph	CG	50	68	53	0	0	18	0.36	No	No			Below
322	Soph	CG	48	64	50	0	0	16	0.307692	No	No			Below
323	Soph	CG	53	72	58	0	0	19	0.404255	No	No			Below
324	Soph	CG	46	63	50	0	0	17	0.314815	No	No			Below
325	Soph	CG	51	69	55	0	0	18	0.367347	No	No			Below
326	Soph	CG	49	67	53	0	0	18	0.352941	No	No			Below
327	Soph	CG	52	71	56	0	0	19	0.395833	No	No			Below
328	Soph	CG	54	74	59	0	0	20	0.434783	No	No			Below
329	Soph	CG	45	62	48	0	0	17	0.309091	No	No			Below
330	Soph	CG	50	68	53	0	0	18	0.36	No	No			Below
331	Soph	CG	48	65	51	0	0	17	0.326923	No	No			Below
332	Soph	CG	53	72	57	0	0	19	0.404255	No	No			Below
333	Soph	CG	46	62	50	0	0	16	0.296296	No	No			Below
334	Soph	CG	51	69	54	0	0	18	0.367347	No	No			Below
335	Soph	CG	49	67	52	0	0	18	0.352941	No	No			Below
336	Soph	CG	52	70	55	0	0	18	0.375	No	No			Below
337	Soph	CG	55	74	61	0	0	19	0.422222	No	No			Below
338	Soph	CG	44	59	47	0	0	15	0.267857	No	No			Below
339	Soph	CG	50	68	54	0	0	18	0.36	No	No			Below
340	Soph	CG	48	65	51	0	0	17	0.326923	No	No			Below
341	Soph	CG	53	72	58	0	0	19	0.404255	No	No			Below
342	Soph	CG	46	63	50	0	0	17	0.314815	No	No			Below
343	Soph	CG	51	70	55	0	0	19	0.387755	No	No			Below
344	Soph	CG	49	67	52	0	0	18	0.352941	No	No			Below
345	Soph	CG	52	71	56	0	0	19	0.395833	No	No			Below
346	Soph	CG	54	74	59	0	0	20	0.434783	No	No			Below
347	Soph	CG	45	62	49	0	0	17	0.309091	No	No			Below
348	Soph	CG	50	68	54	0	0	18	0.36	No	No			Below
349	Soph	CG	48	65	51	0	0	17	0.326923	No	No			Below
350	Soph	CG	53	72	57	0	0	19	0.404255	No	No			Below
351	Soph	CG	46	62	50	0	0	16	0.296296	No	No			Below
352	Soph	CG	51	69	54	0	0	18	0.367347	No	No			Below
353	Soph	CG	49	67	52	0	0	18	0.352941	No	No			Below

## Sheet: Summary
Descriptive Summary for Newton's Laws/Zero Conditional CLIL Dataset
Computed summary based on 353 parsed student records. Physics and reflection summaries use EG-only analysis fields in Clean_Analysis.	Computed summary based on 353 parsed student records. Physics and reflection summaries use EG-only analysis fields in Clean_Analysis.	Computed summary based on 353 parsed student records. Physics and reflection summaries use EG-only analysis fields in Clean_Analysis.	Computed summary based on 353 parsed student records. Physics and reflection summaries use EG-only analysis fields in Clean_Analysis.	Computed summary based on 353 parsed student records. Physics and reflection summaries use EG-only analysis fields in Clean_Analysis.	Computed summary based on 353 parsed student records. Physics and reflection summaries use EG-only analysis fields in Clean_Analysis.	Computed summary based on 353 parsed student records. Physics and reflection summaries use EG-only analysis fields in Clean_Analysis.	Computed summary based on 353 parsed student records. Physics and reflection summaries use EG-only analysis fields in Clean_Analysis.	Computed summary based on 353 parsed student records. Physics and reflection summaries use EG-only analysis fields in Clean_Analysis.	Computed summary based on 353 parsed student records. Physics and reflection summaries use EG-only analysis fields in Clean_Analysis.
Year	Group	N	Mean Pre-Test	Mean Post-Test	Mean Gain	Mean Transfer	Mean Physics	Mean Reflection	Mean Normalized Gain (0-1)		Year-Group	Mean Post-Test	Mean Transfer
Fresh	EG	111	39.95	81.35	41.41	86.41	84.79	4.52	0.694		Fresh-EG	81.35	86.41
Fresh	CG	111	39.89	56.76	16.86	39.95			0.282		Fresh-CG	56.76	39.95
Soph	EG	65	50.92	87.75	36.83	91.62	89.86	4.62	0.755		Soph-EG	87.75	91.62
Soph	CG	66	49.79	67.35	17.56	53.11			0.352		Soph-CG	67.35	53.11
Group	N	Mean Pre-Test	Mean Post-Test	Mean Gain	Mean Transfer	Mean Physics	Mean Reflection
EG	176	44	83.72	39.72	88.34	86.66	4.55
CG	177	43.58	60.71	17.12	44.86
Data Check	Formula/Result	Expected/Note	Status
Total records	353	353	OK
Fresh EG N	111	111	OK
Fresh CG N	111	111	OK
Soph EG N	65	65	OK
Soph CG N	66	66	OK

## Sheet: Codebook
Variable Dictionary and Coding Notes
Variable	Definition	Instrument/Source	Timing	Scale/Range	Coding	Analysis Note
Student ID	Anonymized participant identifier.	Dataset	All phases	Text	001-353	Keep as text to preserve leading zeroes.
Year	Academic level.	Dataset	Baseline descriptor	Categorical	Fresh; Soph	Use as blocking/descriptive factor.
Group	Instructional condition.	Dataset	Research design	Categorical	EG; CG	EG receives Newton's Laws CLIL intervention; CG receives conventional grammar instruction.
Pre-Test	Baseline zero conditional grammar score.	Instrument 1: ZCGT	Pre-test	0-100	Higher = greater accuracy	Used to check initial comparability and calculate gain.
Post-Test	Post-intervention zero conditional grammar score.	Instrument 1: ZCGT	Post-test	0-100	Higher = greater accuracy	Primary grammar outcome.
Gain Score	Post-Test minus Pre-Test.	Derived	Post-analysis	Integer/continuous	Post-Test - Pre-Test	Main improvement index.
Normalized Gain	Gain adjusted by possible improvement.	Derived	Post-analysis	0-1 or percentage	(Post - Pre) / (100 - Pre)	Useful when baseline scores differ.
Transfer-Task	Concept-to-grammar transfer performance.	Instrument 2: CGTT	Post-test	0-100	Higher = better transfer	Core evidence for concept-to-grammar transfer.
Physics-Score	Newton's Laws conceptual understanding.	Instrument 3: CUT	Post-test	0-100	Higher = stronger content understanding	Administered to EG only; CG raw zeroes are not treated as real physics scores.
Reflection	Mean rating on student reflection questionnaire.	Instrument 4	Post-test	1-5	Higher = more positive perceived usefulness	Administered to EG only; CG raw zeroes are not treated as real reflection ratings.
Physics Included	Whether physics score is valid for analysis.	Derived	Post-analysis	Yes/No	Yes for EG; No for CG	Prevents treating CG zeroes as substantive values.
Reflection Included	Whether reflection score is valid for analysis.	Derived	Post-analysis	Yes/No	Yes for EG; No for CG	Prevents treating CG zeroes as substantive values.
Transfer Benchmark	Simple criterion label for CGTT performance.	Derived	Post-analysis	Categorical	Meets if Transfer-Task >= 70	Can be adjusted to match final rubric.

## Sheet: Instruments_Map
Instrument Administration Map
Instrument	Purpose	Administered to	Timing	Main Output Variable(s)	Use in Analysis
Instrument 1: Zero Conditional Grammar Test (ZCGT)	Measures mechanical accuracy of If + Present Simple, Present Simple.	EG and CG	Pre-test and post-test	Pre-Test; Post-Test; Gain Score	Test baseline equivalence and grammar improvement.
Instrument 2: Concept-to-Grammar Transfer Task (CGTT)	Measures ability to translate Newtonian physical events into zero conditional laws.	EG and CG	Post-test	Transfer-Task	Primary transfer outcome comparing EG vs CG.
Instrument 3: Concept Understanding Test (CUT)	Checks understanding of inertia, mass/acceleration, and action-reaction.	EG only	Post-test	Physics-Score	Tests whether grammar gains are linked to content understanding.
Instrument 4: Student Reflection Questionnaire	Captures perceived meaningfulness, engagement, and difficulty.	EG only	Post-test	Reflection; open-ended response codes	Qualitative/triangulation evidence.
Instrument 5: Classroom Observation Checklist	Records real-time concept-to-grammar moments during intervention.	EG classroom	During intervention	Observation frequencies/notes	Qualitative process evidence.

## Sheet: Scoring_Rubrics
Suggested Scoring Rubrics
Instrument	Component	Score/Weight	Criteria	Common Errors	Notes
ZCGT	Multiple choice	1 point per item	Correct present simple form in both clauses.	Future/past tense, subject-verb agreement errors.	Convert total to 100 if needed.
ZCGT	Sentence transformation	2 points per item	1 point correct if-clause; 1 point correct main clause.	Wrong tense, missing if, inaccurate scientific relation.	Allow minor spelling errors that do not affect grammar.
CGTT	Scenario sentence	0-4 per scenario	4 = accurate physics + correct zero conditional; 3 = correct grammar with minor concept error; 2 = concept correct but grammar weak; 1 = partial; 0 = missing/irrelevant.	Using will, past tense, or non-law-like statements.	Total can be scaled to 100.
CUT	True/False items	1 point per item	Correct conceptual judgment.	Misconceptions about force, inertia, mass, and action-reaction.	Use to establish content comprehension.
Reflection	Likert scale	1-5 per statement	Mean score across items; reverse-code difficulty item if creating an overall positivity index.	Treating open-ended text as numeric without coding.	Item 4 indicates vocabulary difficulty and should be interpreted carefully.
Observation	Checklist	Frequency + notes	Record occurrence and evidence for each behavior.	Over-counting repeated teacher prompts as student behavior.	Use inter-rater reliability if multiple observers code.

## Sheet: Observation_Template
Classroom Observation Checklist Template
Date/Session	Observed Behavior	Frequency	Evidence/Notes	Example Student Language	Observer Initials
	Linguistic Scaffolding: Student uses the word "force" to start a conditional sentence.
	Cognitive Conflict: Student struggles to explain a physics result but uses "If..." to figure it out.
	L1 Interference: Student reverts to native language to explain the physics concept.
	Peer Correction: Student corrects a classmate's grammar based on a physics fact.

## Sheet: Reflection_Items
Student Reflection Questionnaire Items
Item No.	Statement	Scale	Direction	Coding/Interpretation
1	Connecting science to grammar made the "If" rules easier to remember.	1 Strongly Disagree - 5 Strongly Agree	Positive	Higher = stronger perceived mnemonic value.
2	I felt like I was learning something useful, not just English rules.	1-5	Positive	Higher = stronger perceived usefulness.
3	The experiments helped me visualize the grammar sentences.	1-5	Positive	Higher = stronger visualization support.
4	I found the science vocabulary too difficult to understand.	1-5	Negative/Difficulty	Reverse-code only if computing an overall positive engagement index.
5	I would like to learn other grammar points (like Passive Voice) through science.	1-5	Positive	Higher = stronger transferability preference.
Open	How did "The Law of Inertia" help you understand when to use the Zero Conditional instead of other tenses?	Text	Qualitative	Code for conceptual hook, tense contrast, scientific-law framing, and difficulty.
