# Supplementary material
Source: Research Square preprint supplement (doi:10.21203/rs.3.rs-10141417/v1)
Supplement: Supplementary file 2 [file f1268bbc38906eea918b0a36.docx]

**Appendices and Research Instruments**

**Newton's Laws-Based CLIL Intervention for Zero Conditional Acquisition**

The following appendices present the instruments, scoring rules, administration schedule, and dataset structure used in the Newton's Laws-based CLIL intervention. The appendices have been organized into a single A-H sequence to avoid duplicated appendix labels and to keep the instrument package internally consistent.

**Table 1**

*Overview of Appendices and Research Instruments*

| **Component** | **Description** |
| --- | --- |
| Research Design | Quasi-experimental pre-test/post-test non-equivalent control group design supplemented by numeric indices and qualitative probes. |
| Experimental Condition | Newton's Laws-based CLIL intervention implemented at Beni-Suef Technological University; zero conditional grammar was taught through scientific laws and physical cause-effect relationships. |
| Control Condition | Conventional grammar instruction using standard examples, rule explanation, and form-focused practice. |
| Main Linguistic Outcome | Zero conditional accuracy, measured by the Zero Conditional Grammar Test (ZCGT). |
| Focal Transfer Construct | Concept-to-Grammar Transfer Task (CGTT), measuring students' ability to convert physical concepts into accurate zero conditional statements. |
| Qualitative Evidence | Student reflection probes and classroom observation records documenting concept-to-grammar mapping. |
| Psychometric Evidence | Construct validity was supported through confirmatory factor analysis, χ²/df = 1.67, CFI = .972. Reliability was supported through McDonald's omega, with coefficients ranging from .84 to .93. |

# Appendix A. Zero Conditional Grammar Test (ZCGT)

**Purpose.** The Zero Conditional Grammar Test measured mechanical accuracy in recognizing and producing the zero conditional form.

**Target structure.** If + present simple, present simple.

**Standardized reliability.** McDonald's omega was ω = .91, and Cronbach's alpha was α = .89.

**Table A1**

*Sample Multiple-Choice Item*

| **Item** | **Sentence** | **Options** |
| --- | --- | --- |
| 1 | If you _____ a heavy object, it _____ more force. | a) pushed / required b) push / requires c) push / will require |

**Table A2**

*Sample Sentence-Transformation Items*

| **Item** | **Prompt** | **Model Answer** |
| --- | --- | --- |
| 1 | Heating ice makes it melt. | If you heat ice, it melts. |
| 2 | Pushing a ball makes it accelerate. | If you push a ball, it accelerates. |

# Appendix B. Concept-to-Grammar Transfer Task (CGTT)

**Purpose.** The Concept-to-Grammar Transfer Task measured the focal transfer construct: students' ability to translate physical causality into accurate zero conditional grammar.

**Standardized reliability.** McDonald's omega was ω = .88, and Cronbach's alpha was α = .86.

**Table B1**

*Sample Concept-to-Grammar Transfer Scenarios*

| **Scenario** | **Description** | **Prompt** | **Model Response** |
| --- | --- | --- | --- |
| The Frictionless Surface | A puck slides on ice with no obstacles or external contact. | Describe the puck's speed if nothing touches it. | If nothing touches the puck, it keeps moving at the same speed. |
| The Two Boxes | A small box and a massive box are pushed with the same force. | Compare their acceleration. | If the same force pushes two boxes, the lighter box accelerates more. |
| The Rocket | Gas is pushed downward and the rocket moves upward. | Describe the direction of the forces. | If a rocket pushes gas down, the gas pushes the rocket up. |

# Appendix C. Concept Understanding Test (CUT)

**Purpose.** The Concept Understanding Test measured students' demonstrated understanding of selected Newtonian concepts in the experimental group after the intervention.

**Standardized reliability.** McDonald's omega was ω = .84, and Cronbach's alpha was α = .82.

**Table C1**

*Sample True/False Items*

| **Item** | **Statement** | **Response Format** |
| --- | --- | --- |
| 1 | Inertia means that an object tends to keep doing what it is currently doing. | True / False |
| 2 | If I double the mass of an object, it becomes easier to accelerate. | True / False |
| 3 | Action and reaction forces happen at the exact same time. | True / False |

# Appendix D. Student Reflection Questionnaire and Qualitative Probes

**Purpose.** The Student Reflection Questionnaire collected numeric perception data and qualitative evidence regarding students' experience of learning zero conditional grammar through Newtonian concepts.

**Response scale.** The questionnaire used a five-point scale ranging from 1 = strongly disagree to 5 = strongly agree.

**Reverse coding.** Item 4 was negatively worded and was reverse-coded only when computing an overall positive engagement index.

**Standardized reliability.** McDonald's omega was ω = .93, and Cronbach's alpha was α = .91.

**Table D1**

*Student Reflection Questionnaire*

| **Item** | **Statement** | **Direction** | **Interpretation** |
| --- | --- | --- | --- |
| 1 | Connecting science to grammar made the if rules easier to remember. | Positive | Higher = stronger perceived mnemonic value. |
| 2 | I felt like I was learning something useful, not just English rules. | Positive | Higher = stronger perceived usefulness. |
| 3 | The experiments helped me visualize the grammar sentences. | Positive | Higher = stronger visualization support. |
| 4 | I found the science vocabulary too difficult to understand. | Negative / difficulty | Reverse-code if computing an overall positive engagement index. |
| 5 | I would like to learn other grammar points, such as passive voice, through science. | Positive | Higher = stronger transferability preference. |

## Qualitative Probes

**Table D2**

*Open-Ended Qualitative Probes*

| **Probe** | **Question** | **Coding Focus** |
| --- | --- | --- |
| 1 | Describe a moment when a physics experiment helped you fix a grammar mistake. | Experiment-based grammar repair |
| 2 | How did physics help you understand the if rule? | Concept-to-grammar mapping |
| 3 | Would you prefer this method for other grammar points? | Perceived transferability of CLIL instruction |

*Note.* Representative responses were reported in Section 6.8 and were used as qualitative evidence rather than as scored questionnaire items.

# Appendix E. Classroom Observation Checklist

**Purpose.** The classroom observation checklist recorded real-time evidence of concept-to-grammar mapping during the CLIL intervention.

**Table E1**

*Classroom Observation Checklist*

| **Observed Behavior** | **Evidence / Notes** | **Example Student Language** |
| --- | --- | --- |
| Linguistic scaffolding | Students used physics terms to trigger grammatical structure. | “Force is the condition, so: If force increases...” |
| Cognitive conflict | Students corrected the use of will by reasoning from scientific law. | “No, it is a law. If I push it, it accelerates.” |
| Peer correction | Students used Newtonian laws to correct each other's syntax. | “The Third Law says it happens now, not in the future.” |

# Appendix F. Administration Schedule and Instrument Matrix

**Purpose.** The administration matrix summarizes when each instrument was administered, which participants completed it, and how each instrument was used analytically.

**Table F1**

*Administration Schedule and Instrument Matrix*

| **Phase** | **Instrument** | **Participants** | **Analysis Use** |
| --- | --- | --- | --- |
| Pre-test | ZCGT | Experimental group and control group | Baseline comparability |
| Post-test | ZCGT | Experimental group and control group | Main grammar outcome |
| Post-test | CGTT | Experimental group and control group | Focal transfer construct comparison |
| Post-test | CUT | Experimental group only | Demonstrated level of Newtonian concept understanding |
| Post-test | Student Reflection Questionnaire | Experimental group only | Qualitative and perception-based triangulation |

# Appendix G. Scoring and Coding Guide

**Purpose.** The scoring and coding guide defines the analytic variables, score ranges, and interpretive direction used in the dataset.

**Table G1**

*Scoring and Coding Guide*

| **Variable** | **Instrument** | **Score Range** | **Interpretive Direction** |
| --- | --- | --- | --- |
| Pre-test | ZCGT | 0-100 | Baseline zero conditional accuracy. |
| Post-test | ZCGT | 0-100 | Post-intervention zero conditional accuracy. |
| Transfer | CGTT | 0-100 | Focal concept-to-grammar transfer performance. |
| Physics score | CUT | 0-100 | Post-intervention Newtonian content understanding in the experimental group. |
| Reflection index | Student Reflection Questionnaire | 1-5 | Perceived meaningfulness and usefulness of learning grammar through science. |
| Transfer benchmark | CGTT | Meets / Does not meet | Functional transfer indicated by a CGTT score of 70 or above. |

*Note.* For the reflection index, Item 4 should be reverse-coded before computing any overall positive engagement score.

# Appendix H. Raw Dataset Structure

**Dataset description.** The dataset contained 353 parsed student records from Beni-Suef Technological University.

**Table H1**

*Raw Dataset Structure*

| **Academic Level** | **Experimental Group** | **Control Group** | **Total** |
| --- | --- | --- | --- |
| Freshman | 111 | 111 | 222 |
| Sophomore | 65 | 66 | 131 |
| Total | 176 | 177 | 353 |

**Dataset note.** The Clean_Analysis sheet included derived normalized gains and the transfer benchmark variable.

**Transfer benchmark rule.** Score ≥ 70 = benchmark achieved; score < 70 = benchmark not achieved.
